# Supplementary material
Source: PubMed Central journal article supplement (PMC6508879)
Supplement: NIHMS1018318-supplement-Supplemental_Figures.pdf [file NIHMS1018318-supplement-Supplemental_Figures.pdf]

**Supplemental Material:**

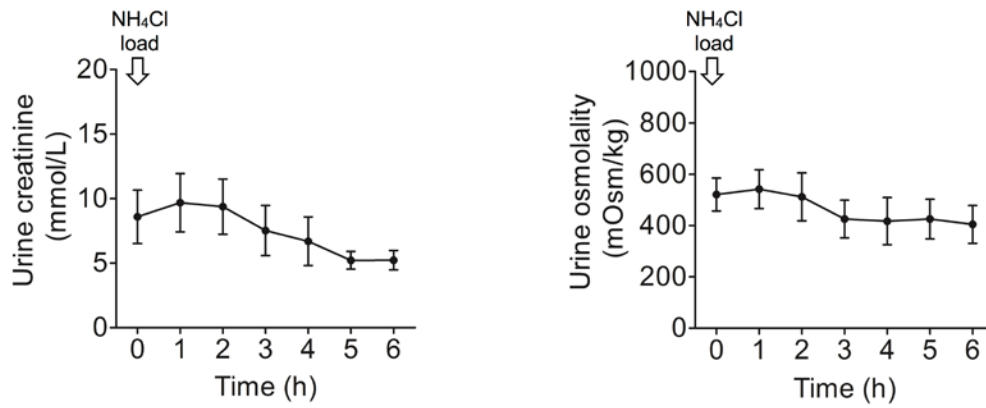

**Figure S1. Urinary creatinine concentration and osmolality during NH<sub>4</sub>Cl loading.** Time 0 represents baseline (prior to treatment). Data are means ± SEM; n = 8. No significant differences compared to baseline were observed.

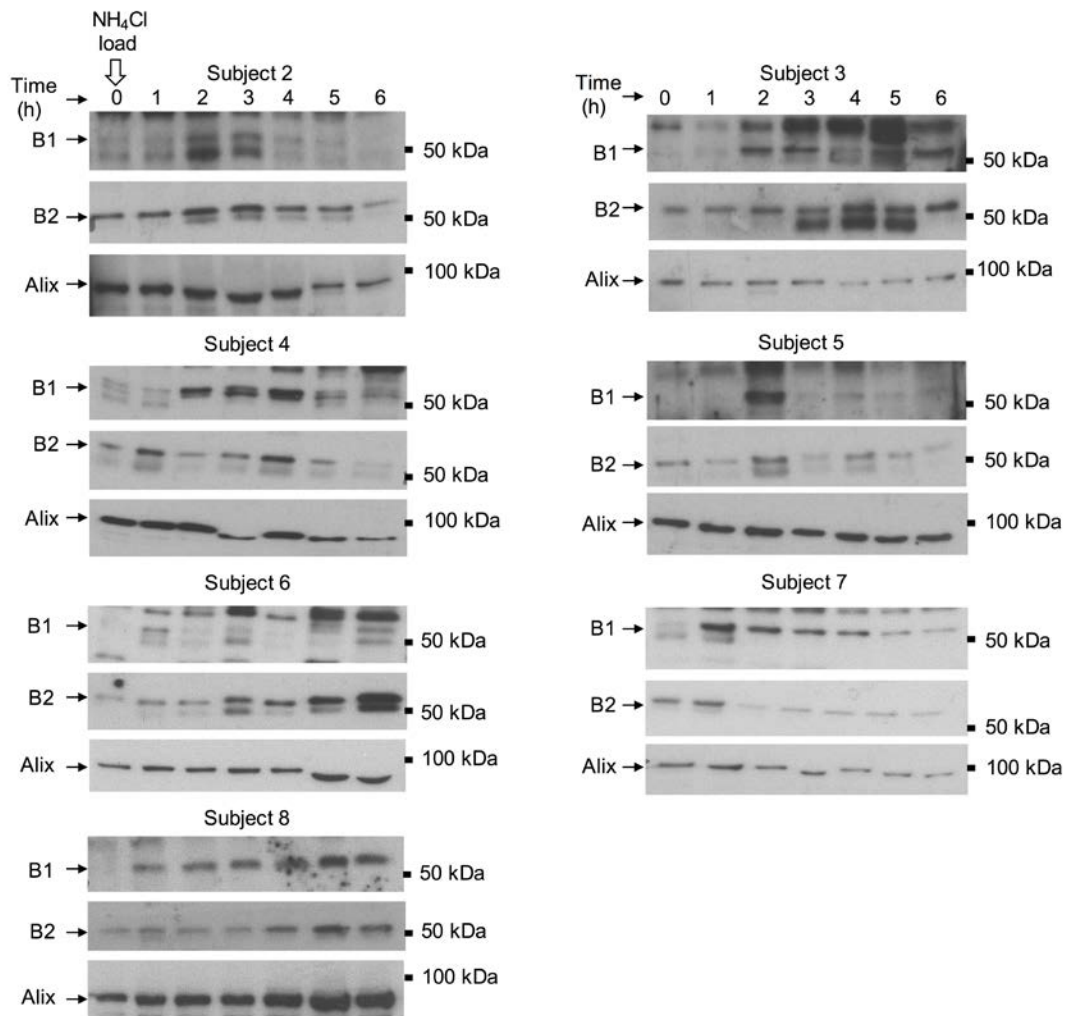

**Figure S2. Effect of  $\text{NH}_4\text{Cl}$  loading on B subunit abundance in urinary exosomes.** Immunoblots of urinary exosomes isolated from 7 different participants, probed with B1 (upper panel), B2 (middle panel) and alix (lower panel) antibodies.

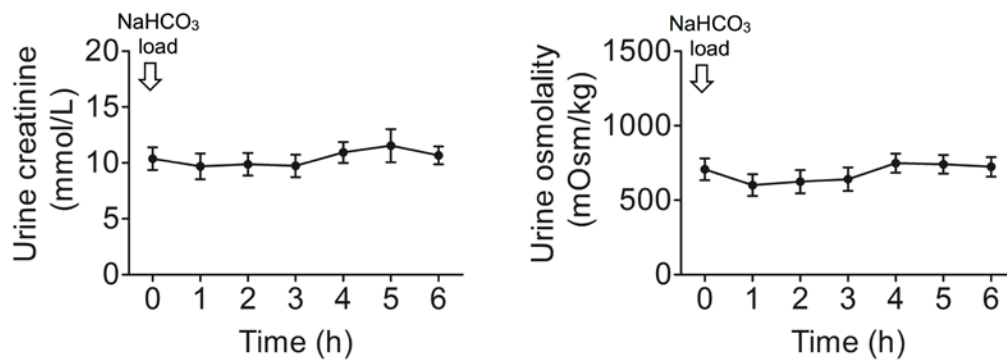

**Figure S3. Urinary creatinine concentration and osmolality during  $\text{NH}_4\text{Cl}$  loading.** Time 0 represents baseline (prior to treatment). Data are means  $\pm$  SEM; n = 8. No significant differences compared to baseline were observed.

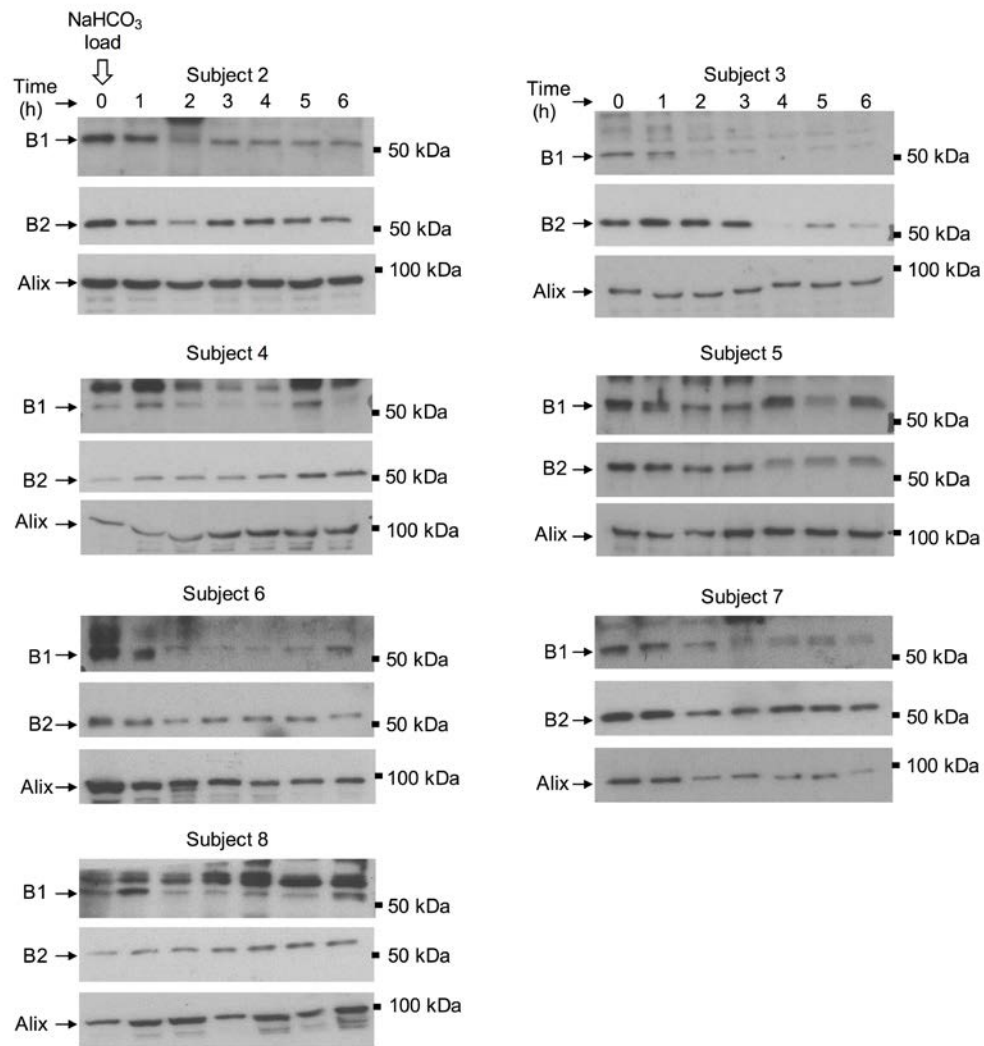

**Figure S4. Effect of  $\text{NaHCO}_3$  loading on B subunit abundance in urinary exosomes.** Immunoblots of urinary exosomes isolated from 7 different participants, probed with B1 (upper panel), B2 (middle panel) and alix (lower panel) antibodies.

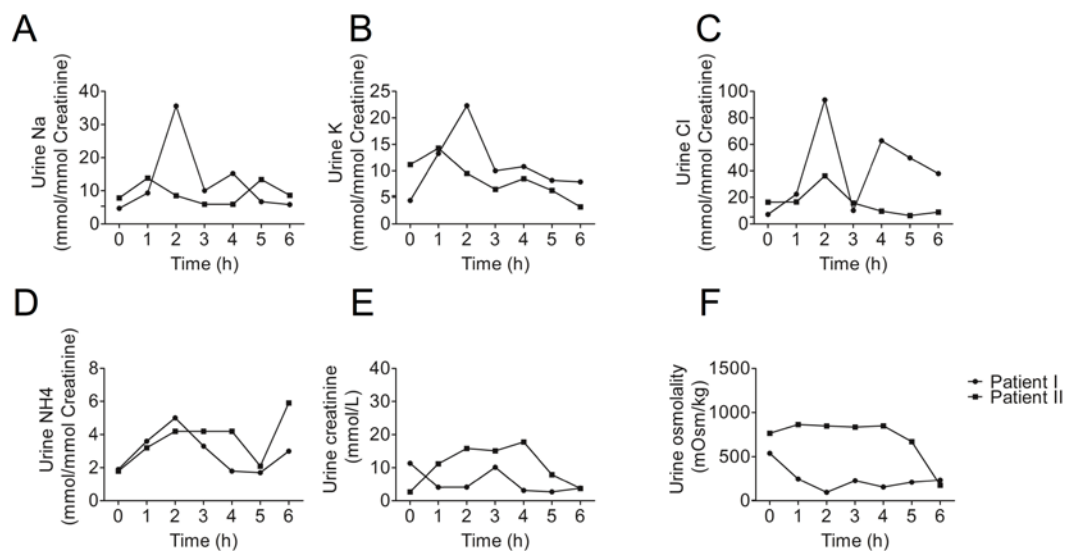

**Figure S5. Urinary Na (A), K (B), Cl (C), NH<sub>4</sub> (D), creatinine (E) and osmolality (F) during NH<sub>4</sub>Cl loading in two dRTA patients. Time 0 represents baseline (prior to treatment).**
